# Supplementary material for: Differentiating Benign from Malignant Thyroid Tumors by Kinase Activity Profiling and Dabrafenib BRAF V600E Targeting
Source: MDPI journal article supplement (doi:10.3390/cancers15184477), 2023-09-08
Supplement: s1 [file s1]

**Supplementary Table S1.** Information of all patients included in the study.

| Sample Number | Diagnosis   | Oncocytic | Class     | Gender | AOD | Recurrent (R) / Non-recurrent (NR) | primary/meta | % tumor cells | necrosis | Molecular genetic typing | w-CIN | gain/loss imbalance | Prediction score | Classification | Inhibitor testing |
|---------------|-------------|-----------|-----------|--------|-----|------------------------------------|--------------|---------------|----------|--------------------------|-------|---------------------|------------------|----------------|-------------------|
| Th-13         | FA          |           | benign    | F      | 71  | NA                                 | primary      | 80            |          | NFNV                     |       |                     | 0.040            |                |                   |
| Th-29         | FA          |           | benign    | M      | 46  | NA                                 | primary      | 50            |          | NFNV                     |       |                     | -0.442           | FALSE          |                   |
| Th-31         | FA          |           | benign    | M      | 57  | NA                                 | primary      | 70            |          | NFNV                     |       |                     | 0.993            |                |                   |
| Th-32         | FA          |           | benign    | F      | 6   | NA                                 | primary      | 60            |          | NFNV                     |       |                     | 0.167            |                |                   |
| Th-35         | OA          | O         | benign    | F      | 37  | NA                                 | primary      | 60            |          | NRAS                     |       | loss chr 22         | -0.103           | FALSE          |                   |
| Th-54         | OA          | O         | benign    | F      | 64  | NA                                 | primary      | 50            |          | NFNV                     | *     | R                   | 0.010            |                |                   |
| Th-55         | OA          | O         | benign    | F      | 61  | NA                                 | primary      | 50            |          | NFNV                     | *     | R                   | -0.272           | FALSE          |                   |
| Th-10         | HP          |           | benign    | F      | 72  | NA                                 | primary      |               |          | ND                       |       |                     | 0.886            |                |                   |
| Th-16         | HP          |           | benign    | M      | 61  | NA                                 | primary      |               |          | ND                       |       |                     | 0.708            |                |                   |
| Th-18         | HP          |           | benign    | M      | 51  | NA                                 | primary      |               |          | ND                       |       |                     | 1.212            |                |                   |
| Th-21         | HP          |           | benign    | F      | 56  | NA                                 | primary      |               |          | NFNV                     |       |                     | 0.348            |                |                   |
| Th-26         | HP          |           | benign    | F      | 63  | NA                                 | primary      |               |          | ND                       |       |                     | 0.803            |                |                   |
| Th-34         | HP          |           | benign    | F      | 55  | NA                                 | primary      |               |          | NFNV                     |       |                     | 0.431            |                |                   |
| Th-36         | HP          |           | benign    | F      | 62  | NA                                 | primary      |               |          | ND                       |       |                     | 0.372            |                |                   |
| Th-4          | HP          |           | benign    | F      | 62  | NA                                 | primary      |               |          | NFNV                     |       |                     | 0.143            |                |                   |
| Th-5          | HP          |           | benign    | M      | 77  | NA                                 | primary      |               |          | NFNV                     |       |                     | 0.682            |                |                   |
| Th-57         | HP          |           | benign    | M      | 13  | NA                                 | primary      |               |          | NFNV                     |       |                     | 0.576            |                |                   |
| Th-9          | HP          |           | benign    | F      | 56  | NA                                 | primary      |               |          | ND                       |       |                     | 1.326            |                |                   |
| Th-22         | HP (Graves) |           | benign    | F      | 54  | NA                                 | primary      |               |          | ND                       |       |                     | -0.143           | FALSE          |                   |
| Th-46         | HP (Graves) |           | benign    | F      | 48  | NR                                 | primary      |               |          | NFNV                     |       |                     | -0.121           | FALSE          |                   |
| Th-7          | HP (Graves) |           | benign    | F      | 59  | NA                                 | primary      |               |          | ND                       |       |                     | 0.132            |                |                   |
| Th-1          | ATC         |           | malignant | F      | 87  | R                                  | meta         | 100           |          | NFNV                     |       |                     | -0.441           |                |                   |
| Th-2          | ATC         |           | malignant | M      | 43  | R                                  | primary      | 70            |          | IDH1                     |       |                     | -0.666           |                |                   |
| Th-24         | ATC         |           | malignant | M      | 73  | R                                  | primary      | 60            |          | HRAS                     |       |                     | -0.209           |                |                   |
| Th-39         | ATC         |           | malignant | F      | 57  | R                                  | primary      | 30            | n        | NRAS                     |       |                     | -0.714           |                |                   |
| Th-43         | ATC         |           | malignant | F      | 64  | R                                  | primary      | 30            | n        | BRAF V600E               |       |                     | -1.008           |                |                   |
| Th-47         | ATC         |           | malignant | M      | 69  | R                                  | primary      | 30            | n        | HSPA8 (e9) - MET (i3-e4) |       |                     | 0.203            | FALSE          |                   |

|       |             |   |           |   |    |    |         |    |   |                                                             |   |            |        |       |   |
|-------|-------------|---|-----------|---|----|----|---------|----|---|-------------------------------------------------------------|---|------------|--------|-------|---|
| Th-49 | ATC         |   | malignant | M | 66 | R  | primary | 40 |   | NFNV                                                        |   |            | -0.736 |       |   |
| Th-6  | ATC         |   | malignant | F | 79 | R  | meta    | 50 | n | BRAF V600E                                                  |   |            | 0.121  | FALSE |   |
| Th-3  | ATC         | O | malignant | M | 43 | R  | primary | 80 |   | IDH1, AQP4 (e1) - RAF1 (l8-e9), FGFR3 (e17-i17) - LCN2 (e7) | * | loss (NHG) | -0.499 |       |   |
| Th-51 | ATC         | O | malignant | F | 59 | R  | primary | 80 |   | NFNV                                                        | * | loss (NHG) | 0.331  | FALSE |   |
| Th-27 | FTC         |   | malignant | M | 79 | R  | primary | 80 |   | NFNV                                                        |   |            | -0.561 |       |   |
| Th-44 | FTC         |   | malignant | F | 75 | R  | meta    | 30 | n | NFNV                                                        |   |            | 0.0963 | FALSE |   |
| Th-45 | FTC         |   | malignant | M | 74 | NR | primary | 70 |   | NFNV                                                        |   |            | -0.543 |       |   |
| Th-48 | FTC         |   | malignant | F | 36 | R  | primary | 60 |   | NRAS                                                        |   |            | 1.005  | FALSE |   |
| Th-50 | FVPTC       |   | malignant | M | 16 | NR | primary | 70 |   | NFNV                                                        |   |            | -0.840 |       | X |
| Th-52 | FVPTC       |   | malignant | M | 47 | R  | primary | 80 |   | NRAS, IDH2                                                  |   |            | -0.420 |       | X |
| Th-53 | FVPTC       |   | malignant | M | 39 | NR | primary | 70 |   | NFNV                                                        |   |            | -0.444 |       | X |
| Th-41 | OCA         | O | malignant | M | 66 | R  | primary | 60 |   | NFNV                                                        | * | loss (NHG) | 0.519  | FALSE |   |
| Th-42 | OCA         | O | malignant | M | 59 | R  | primary | 30 |   | NFNV                                                        | * | loss (NHG) | 0.120  | FALSE |   |
| Th-23 | OCA (+ ATC) | O | malignant | F | 69 | UK | primary | 20 |   | NFNV                                                        |   |            | -0.464 |       |   |
| Th-40 | OCA-MI      | O | malignant | F | 78 | NR | primary | 50 |   | NFNV                                                        | * | imbalance  | -0.239 |       |   |
| Th-56 | OCA-MI      | O | malignant | F | 78 | NR | primary | 70 |   | NFNV                                                        |   |            | -0.162 |       |   |
| Th-11 | PTC         |   | malignant | M | 80 | R  | meta    | 60 |   | NFNV                                                        |   |            | 0.883  | FALSE | X |
| Th-12 | PTC         |   | malignant | F | 42 | R  | meta    | 60 |   | NFNV                                                        |   |            | -0.457 |       | X |
| Th-14 | PTC         |   | malignant | M | 76 | R  | meta    | 70 |   | BRAF V600E                                                  |   |            | -0.889 |       |   |
| Th-15 | PTC         |   | malignant | F | 56 | NR | meta    | 60 |   | BRAF V600E                                                  |   |            | -0.299 |       | X |
| Th-17 | PTC         |   | malignant | M | 45 | NR | meta    | 80 |   | BRAF V600E                                                  |   |            | -0.070 |       | X |
| Th-19 | PTC         |   | malignant | F | 21 | NR | primary | 50 |   | NFNV                                                        |   |            | -0.335 |       |   |
| Th-25 | PTC         |   | malignant | M | 79 | NR | meta    | 50 |   | BRAF V600E                                                  |   |            | -0.855 |       | X |
| Th-28 | PTC         |   | malignant | F | 34 | R  | meta    | 20 |   | BRAF V600E                                                  |   |            | -0.084 |       | X |
| Th-30 | PTC         |   | malignant | F | 24 | NR | primary | 50 |   | BRAF V600E                                                  |   |            | -0.517 |       | X |
| Th-37 | PTC         |   | malignant | M | 67 | R  | LN meta | 50 |   | BRAF V600E                                                  |   |            | -1.160 |       | X |
| Th-38 | PTC         |   | malignant | F | 18 | NR | primary | 50 |   | BRAF V600E                                                  |   |            | -1.190 |       | X |
| Th-8  | PTC         |   | malignant | F | 54 | R  | meta    | 50 |   | CCDC6 (e1) - RET (e12), TERTc.-124 C>T                      |   |            | -1.136 |       | X |

|       |             |   |           |   |    |    |         |    |   |                                                             |   |            |        |       |   |
|-------|-------------|---|-----------|---|----|----|---------|----|---|-------------------------------------------------------------|---|------------|--------|-------|---|
| Th-49 | ATC         |   | malignant | M | 66 | R  | primary | 40 |   | NFNV                                                        |   |            | -0.736 |       |   |
| Th-6  | ATC         |   | malignant | F | 79 | R  | meta    | 50 | n | BRAF V600E                                                  |   |            | 0.121  | FALSE |   |
| Th-3  | ATC         | O | malignant | M | 43 | R  | primary | 80 |   | IDH1, AQP4 (e1) - RAF1 (l8-e9), FGFR3 (e17-i17) - LCN2 (e7) | * | loss (NHG) | -0.499 |       |   |
| Th-51 | ATC         | O | malignant | F | 59 | R  | primary | 80 |   | NFNV                                                        | * | loss (NHG) | 0.331  | FALSE |   |
| Th-27 | FTC         |   | malignant | M | 79 | R  | primary | 80 |   | NFNV                                                        |   |            | -0.561 |       |   |
| Th-44 | FTC         |   | malignant | F | 75 | R  | meta    | 30 | n | NFNV                                                        |   |            | 0.0963 | FALSE |   |
| Th-45 | FTC         |   | malignant | M | 74 | NR | primary | 70 |   | NFNV                                                        |   |            | -0.543 |       |   |
| Th-48 | FTC         |   | malignant | F | 36 | R  | primary | 60 |   | NRAS                                                        |   |            | 1.005  | FALSE |   |
| Th-50 | FVPTC       |   | malignant | M | 16 | NR | primary | 70 |   | NFNV                                                        |   |            | -0.840 |       | X |
| Th-52 | FVPTC       |   | malignant | M | 47 | R  | primary | 80 |   | NRAS, IDH2                                                  |   |            | -0.420 |       | X |
| Th-53 | FVPTC       |   | malignant | M | 39 | NR | primary | 70 |   | NFNV                                                        |   |            | -0.444 |       | X |
| Th-41 | OCA         | O | malignant | M | 66 | R  | primary | 60 |   | NFNV                                                        | * | loss (NHG) | 0.519  | FALSE |   |
| Th-42 | OCA         | O | malignant | M | 59 | R  | primary | 30 |   | NFNV                                                        | * | loss (NHG) | 0.120  | FALSE |   |
| Th-23 | OCA (+ ATC) | O | malignant | F | 69 | UK | primary | 20 |   | NFNV                                                        |   |            | -0.464 |       |   |
| Th-40 | OCA-MI      | O | malignant | F | 78 | NR | primary | 50 |   | NFNV                                                        | * | imbalance  | -0.239 |       |   |
| Th-56 | OCA-MI      | O | malignant | F | 78 | NR | primary | 70 |   | NFNV                                                        |   |            | -0.162 |       |   |
| Th-11 | PTC         |   | malignant | M | 80 | R  | meta    | 60 |   | NFNV                                                        |   |            | 0.883  | FALSE | X |
| Th-12 | PTC         |   | malignant | F | 42 | R  | meta    | 60 |   | NFNV                                                        |   |            | -0.457 |       | X |
| Th-14 | PTC         |   | malignant | M | 76 | R  | meta    | 70 |   | BRAF V600E                                                  |   |            | -0.889 |       |   |
| Th-15 | PTC         |   | malignant | F | 56 | NR | meta    | 60 |   | BRAF V600E                                                  |   |            | -0.299 |       | X |
| Th-17 | PTC         |   | malignant | M | 45 | NR | meta    | 80 |   | BRAF V600E                                                  |   |            | -0.070 |       | X |
| Th-19 | PTC         |   | malignant | F | 21 | NR | primary | 50 |   | NFNV                                                        |   |            | -0.335 |       |   |
| Th-25 | PTC         |   | malignant | M | 79 | NR | meta    | 50 |   | BRAF V600E                                                  |   |            | -0.855 |       | X |
| Th-28 | PTC         |   | malignant | F | 34 | R  | meta    | 20 |   | BRAF V600E                                                  |   |            | -0.084 |       | X |
| Th-30 | PTC         |   | malignant | F | 24 | NR | primary | 50 |   | BRAF V600E                                                  |   |            | -0.517 |       | X |
| Th-37 | PTC         |   | malignant | M | 67 | R  | LN meta | 50 |   | BRAF V600E                                                  |   |            | -1.160 |       | X |
| Th-38 | PTC         |   | malignant | F | 18 | NR | primary | 50 |   | BRAF V600E                                                  |   |            | -1.190 |       | X |
| Th-8  | PTC         |   | malignant | F | 54 | R  | meta    | 50 |   | CCDC6 (e1) - RET (e12), TERTc.-124 C>T                      |   |            | -1.136 |       | X |

**Supplementary Table S2.** *p*-Values of the median serine/threonine kinase activity.

| p-Values |    |       |       |              |       |              |              |
|----------|----|-------|-------|--------------|-------|--------------|--------------|
|          | FA | OA    | HP    | ATC          | FTC   | OCA          | PTC          |
| FA       |    | 0.125 | 0.274 | 0.235        | 0.932 | 0.092        | 0.156        |
| OA       |    |       | 0.061 | 0.698        | 0.245 | 0.9          | 0.976        |
| HP       |    |       |       | <b>0.008</b> | 0.255 | <b>0.021</b> | <b>0.001</b> |
| ATC      |    |       |       |              | 0.308 | 0.694        | 0.633        |
| FTC      |    |       |       |              |       | 0.199        | 0.178        |
| OCA      |    |       |       |              |       |              | 0.967        |
| PTC      |    |       |       |              |       |              |              |
